# Supplementary material for: Stxbp1/Munc18-1 haploinsufficiency impairs inhibition and mediates key neurological features of STXBP1 encephalopathy
Source: eLife. 2020 Feb 19;9:e48705. doi: 10.7554/eLife.48705 (PMC7056272; doi:10.7554/eLife.48705)
Supplement: Supplementary file 1. — The parameters charactering the SWDs, myoclonic jerks, and myoclonic jumps of each WT and Stxbp1tm1d/+ mouse are presented in the table. [file elife-48705-supp1.xlsx]

## Sheet: WT and Stxbp1tm1d Het mice
Table S1. Video-EEG/EMG phenotypes of individual mice
Stxbp1+/+ (n = 11)
Mouse ID	266	317	567	576	577	1248	1253	1254	1282	1284	1286	# of Mice
Genotype	+/+	+/+	+/+	+/+	+/+	+/+	+/+	+/+	+/+	+/+	+/+	11 Mice
Gender	F	M	M	M	M	M	M	M	F	F	F	7 M, 4 F
Video-EEG/EMG recording time (hour)	72.3333	72.3167	72.8	72.4667	72.4667	72.1833	72.1833	72.1833	72.2	72.2	72.2
SWD frequency (#/hour)	0.359447	0.110625	1.20879	1.11776	0.358786	0.443316	0.0415608	0.166243	0.692521	0.207756	0.457064	11 Mice
SWD spike rate (Hz)	4.9394	8.0212	5.1603	5.7848	6.6814	5.7892	4.6498	5.0474	5.4093	5.2217	4.7289
Average duration of SWDs (s)	1.196	1.2415	1.3354	1.395	1.5837	1.2097	1.25	1.4746	1.1993	1.1231	1.1806
Long SWDs (≥ 4 s) in REM sleep (#/day)	0	0	0	0	0	0	0	0	0	0	0	0 Mice
Average duration of long SWDs in REM sleep (s)	-	-	-	-	-	-	-	-	-	-	-
Long SWDs (≥ 4 s) in awake (#/day)	0	0	0	0	0	0.99746	0	0	0	0	0	1 Mice
Average duration of long SWDs in awake (s)	-	-	-	-	-	4.85167	-	-	-	-	-
SWD clusters (≥ 5 SWD, ≤ 60 s interval) (#/day)	0	0	0	0	0	0	0	0	0	0	0	0 Mice
Average duration of SWD clusters (s)	-	-	-	-	-	-	-	-	-	-	-
Average # of SWDs in a SWD cluster	-	-	-	-	-	-	-	-	-	-	-
Myoclonic jerk frequency (#/day)	4.31336	4.64623	3.2967	1.65593	2.31831	1.99492	5.31979	6.31725	1.99446	2.32687	2.32687	11 Mice
Myoclonic jerks in awake (#/day)	1.99078	1.32749	0.989011	0.662374	0.331187	0	0	0.664973	0	0.33241	0
Myoclonic jerks in REM sleep (#/day)	0	0	0.32967	0.331187	0	0	0	0	0	0	0
Myoclonic jerks in NREM sleep (#/day)	2.32258	3.31874	1.97802	0.662374	1.98712	1.99492	5.31979	5.65227	1.99446	1.99446	2.32687
Myoclonic jumps (#/day)	0	0	0	0	0.331187	0	0	0	0	0.66482	0	2 Mice
Myoclonic jumps in REM sleep (#/day)	0	0	0	0	0	0	0	0	0	0	0
Myoclonic jumps in NREM sleep (#/day)	0	0	0	0	0	0	0	0	0	0	0
Myoclonic jumps in awake (#/day)	0	0	0	0	0.331187	0	0	0	0	0.66482	0
Stxbp1tm1d/+ (n = 13)
Mouse ID	259	264	268	269	309	315	348	561	563	568	569	1251	1279	# of Mice
Genotype	+/–	+/–	+/–	+/–	+/–	+/–	+/–	+/–	+/–	+/–	+/–	+/–	+/–	13 Mice
Gender	M	F	F	F	F	M	M	M	F	M	M	F	F	6 M, 7 F
Video-EEG/EMG recording time (hour)	75.3667	72.3333	72.25	75.3667	72.3167	72.3167	73.6	72.8	72.8	72.4667	72.4667	72.1833	72.2
SWD frequency (#/hour)	16.2804	27.2074	14.9066	16.705	21.7516	3.04218	13.8451	17.2253	9.60165	16.6973	32.0423	36.4489	30.4294	13 Mice
SWD spike rate (Hz)	6.0547	4.4188	5.4072	5.2629	5.2629	4.8336	5.8575	6.2382	4.3979	3.6258	5.0669	4.4941	3.7731
Average duration of SWDs (s)	1.2688	1.2827	1.2978	1.2181	1.0046	1.4517	1.3475	1.0937	1.6277	1.8425	1.539	1.2733	1.3643
Long SWDs (≥ 4 s) in REM sleep (#/day)	3.18443	0.663594	0.66436	0	0.331874	0	1.95652	1.31868	0	7.6173	0.331187	1.66243	2.99169	10 Mice
Average duration of long SWDs in REM sleep (s)	4.2092	4.0635	4.065	-	4.009	-	4.17333	4.236	-	4.92352	4.76	4.28657	4.24522
Long SWDs (≥ 4 s) in awake (#/day)	0.318443	0	0	0	0	0	0.326087	0	0.659341	0	1.65593	0	0	4 Mice
Average duration of long SWDs in awake (s)	4.134	-	-	-	-	-	4.008	-	4.2225	-	4.333	-	-
SWD clusters (≥ 5 SWD, ≤ 60 s interval) (#/day)	8.91641	24.553	5.97924	6.68731	9.95621	2.32312	6.84783	9.56044	7.25275	12.9163	28.8132	38.236	29.5845	13 Mice
Average duration of SWD clusters (s)	163.638	163.656	153.459	147.265	190.474	137.881	121.636	139.608	161.058	167.029	167.68	187.663	173.186
Average # of SWDs in a SWD cluster	7.92857	8.05455	7.23077	7.83333	8.26667	7	6.875	7.71429	9	18.3333	8.54054	9.27826	9.18182
Myoclonic jerk frequency (#/day)	30.889	10.2857	18.2699	14.3299	3.31874	14.6024	3.26087	13.5165	201.099	79.816	2.31831	11.637	43.2133	13 Mice
Myoclonic jerks in awake (#/day)	5.41353	6.96774	4.65052	3.50287	0.331874	4.31436	0.326087	5.93407	172.088	72.8611	1.32475	1.66243	5.65097
Myoclonic jerks in REM sleep (#/day)	2.54755	1.65899	8.63668	2.86599	1.65937	5.64185	0.652174	2.30769	0.659341	0	0	1.32995	1.99446
Myoclonic jerks in NREM sleep (#/day)	22.9279	1.65899	4.9827	7.96108	1.32749	4.64623	2.28261	5.27473	28.3516	6.95492	0.99356	8.64465	35.5679
Myoclonic jumps (#/day)	3.50287	11.2811	14.6159	7.96108	4.97811	9.29246	3.26087	7.25275	1.64835	3.97424	4.63661	5.98476	4.65374	13 Mice
Myoclonic jumps in REM sleep (#/day)	1.27377	7.29954	10.9619	4.13976	3.98248	8.29684	2.6087	1.64835	0.659341	3.64305	1.32475	3.65735	2.99169
Myoclonic jumps in NREM sleep (#/day)	1.27377	2.32258	2.65744	1.59222	0.995621	0.331874	0.652174	3.2967	0.659341	0.331187	1.65593	1.32995	0.99723
Myoclonic jumps in awake (#/day)	0.95533	1.65899	0.99654	2.2291	0	0.663747	0	2.30769	0.32967	0	1.65593	0.99746	0.66482
