# Supplementary material for: Stxbp1/Munc18-1 haploinsufficiency impairs inhibition and mediates key neurological features of STXBP1 encephalopathy
Source: eLife. 2020 Feb 19;9:e48705. doi: 10.7554/eLife.48705 (PMC7056272; doi:10.7554/eLife.48705)
Supplement: Supplementary file 3. — The details of all statistical tests, numbers of replicates, and P values are presented for each experiment in the table. [file elife-48705-supp3.xlsx]

## Sheet: Sheet1
Figure	Experiment	Parameter	Stxbp1+/+ vs Stxbp1tm1d/+			Stxbp1+/+ vs Stxbp1tm1a/+			Gender Effect (P value)		Gender Difference (P value)
											tm1d (+/+ vs +/–)		tm1a (+/+ vs +/–)
			Statistical test	N (mouse) or n (neuron) of N (mouse)	P value	Statistical test	N (mouse) or n (neuron) of N (mouse)	P value	Stxbp1+/+ vs Stxbp1tm1d/+	Stxbp1+/+ vs Stxbp1tm1a/+	Male	Female	Male	Female
1C	Western blot	Normalized Stxbp1 levels (aCTX)	Unpaired t test with Welch's correction	4 vs 4	0.0032	Unpaired t test with Welch's correction	4 vs 4	< 0.0001
		Normalized Stxbp1 levels (pCTX)	Unpaired t test with Welch's correction	4 vs 4	0.0022	Unpaired t test with Welch's correction	4 vs 4	0.0033
		Normalized Stxbp1 levels (HIP)	Mann-Whitney test	4 vs 4	0.0286	Unpaired t test with Welch's correction	4 vs 4	0.0008
		Normalized Stxbp1 levels (TH + HY)	Unpaired t test with Welch's correction	4 vs 4	0.0114	Unpaired t test with Welch's correction	4 vs 4	0.0013
		Normalized Stxbp1 levels (STR)	Mann-Whitney test	4 vs 4	0.0286	Unpaired t test with Welch's correction	4 vs 4	0.0057
		Normalized Stxbp1 levels (CB)	Unpaired t test with Welch's correction	4 vs 4	0.0161	Unpaired t test with Welch's correction	4 vs 4	0.012
		Normalized Stxbp1 levels (OLF)	Unpaired t test with Welch's correction	4 vs 4	0.008	Unpaired t test with Welch's correction	4 vs 4	0.0691
		Normalized Stxbp1 levels (MB + HB)	Mann-Whitney test	4 vs 4	0.0286	Unpaired t test with Welch's correction	4 vs 4	0.001
1D	Survival	Mendelian ratio - total	Chi-square test	334 vs 220	< 0.0001	Chi-square test	311 vs 227	0.0003
1F	General health	Body weight (male)	Two-way ANOVA	16 vs 16	< 0.0001	Two-way ANOVA	16 vs 17	< 0.0001
		Body weight (female)	Two-way ANOVA	18 vs 16	< 0.0001	Two-way ANOVA	18 vs 17	0.0002
1G		Dystonia	Log-rank (Mantel-Cox) test	38 vs 38	< 0.0001	Log-rank (Mantel-Cox) test	22 vs 22	< 0.0001			< 0.0001	< 0.0001	< 0.0001	< 0.0001
1-S1 C	Western blot	Normalized Stxbp1 level (embryonic day 17.5)	One-way ANOVA with Holm-Sidak's multiple comparisons test	5 vs 3 (Stxbp1+/+ vs Stxbp1tm1d/+)	0.0001	One-way ANOVA with Holm-Sidak's multiple comparisons test	4 vs 3 (Stxbp1+/+ vs Stxbp1tm1a/+)	0.0041
			One-way ANOVA with Holm-Sidak's multiple comparisons test	5 vs 4 (Stxbp1+/+ vs Stxbp1tm1d/tm1d)	< 0.0001	One-way ANOVA with Holm-Sidak's multiple comparisons test	4 vs 3 (Stxbp1+/+ vs Stxbp1tm1a/tm1a)	0.0002
1-S2 A	Survival	Mendelian ratio - male	Chi-square test	178 vs 101	< 0.0001	Chi-square test	182 vs 128	0.0022
		Mendelian ratio - female	Chi-square test	156 vs 119	0.0257	Chi-square test	129 vs 99	0.0469
1-S2 B		Survival curve	Log-rank (Mantel-Cox) test	36 vs 37	0.9272	Log-rank (Mantel-Cox) test	20 vs 22	0.4521			0.3977	0.5397	0.4554	0.0898
2B	Open-field test	Moving distance	Mann-Whitney test	22 vs 22	0.0271	Mann-Whitney test	24 vs 24	0.0032	0.0619	0.0442			0.0314	0.3748
2C		Moving speed	Mann-Whitney test	22 vs 22	0.0036	Unpaired t test with Welch's correction	24 vs 24	0.0148	0.1601	0.4376
2D		Center/total distance	Unpaired t test with Welch's correction	22 vs 22	< 0.0001	Unpaired t test with Welch's correction	24 vs 24	0.0003	0.2993	0.3458
2E		Vertical activity counts	Mann-Whitney test	22 vs 22	0.009	Mann-Whitney test	24 vs 24	0.0089	0.4236	0.5865
2F	Forelimb grip strength	Grip strength	Unpaired t test with Welch's correction	22 vs 22	0.0074	Mann-Whitney test	41 vs 41	0.018	0.0001	<0.0001	0.1049	0.0214	0.0398	0.1059
2G	Foot slip test	Normalized foot slips	Mann-Whitney test	25 vs 24	< 0.0001	Mann-Whitney test	28 vs 28	< 0.0001	0.327	0.472
2H	Vertical pole test	Time on pole	Mann-Whitney test	22 vs 21	0.0002	Mann-Whitney test	20 vs 19	0.0004	0.7604	0.2578
2-S1 A	Rotarod test (6–7 weeks, 2 days of 4–40 RPM)	Walking time	Two-way ANOVA with Sidak's multiple comparisons test	22 vs 22	0.0102				0.1562
		Latency to fall	Two-way ANOVA with Sidak's multiple comparisons test		0.0072				0.2947
2-S1 B	Rotarod test (26–27 weeks, 2 days of 4–40 RPM)	Walking time	Two-way ANOVA with Sidak's multiple comparisons test	22 vs 21	0.5225				0.8441
		Latency to fall	Two-way ANOVA with Sidak's multiple comparisons test		0.256				0.7765
2-S1 C	Rotarod test (61–69 weeks, 2 days of 4–40 RPM)	Walking time	Two-way ANOVA with Sidak's multiple comparisons test	22 vs 19	0.8449				0.968
		Latency to fall	Two-way ANOVA with Sidak's multiple comparisons test		0.6434				0.7078
2-S1 D	Rotarod test (10–11 weeks, 2 days of 4–40 RPM followed by 2 days of 8–80 RPM)	Walking time	Two-way ANOVA with Sidak's multiple comparisons test	16 vs 16	0.1227				0.0211		0.6659	0.162
		Latency to fall	Two-way ANOVA with Sidak's multiple comparisons test		0.2113				0.2711
2-S1 E	Dowel test (6.5-mm)	Time on dowel	Mann-Whitney test	22 vs 22	0.0864				0.046		0.3121	0.6712
2-S1 F	Dowel test (9.5-mm)	Time on dowel	Mann-Whitney test	22 vs 22	0.1754				0.1886
2-S1 G	Inverted screen test	Time on screen	Mann-Whitney test	22 vs 22	> 0.9999				0.3687
2-S1 H	Wire hang test	Time on wire	Mann-Whitney test	22 vs 22	0.8536				0.3161
2-S2 A	Startle reactivity	Startle response	Two-way ANOVA with Sidak's multiple comparisons test	12 vs 12	0.1418	Two-way ANOVA with Sidak's multiple comparisons test	21 vs 19	0.3398	0.0374	<0.0001	0.1499	0.4311	0.6526	0.2814
2-S2 B	Pre-pulse inhibition	Startle inhibition	Two-way ANOVA with Sidak's multiple comparisons test	12 vs 12	0.7022	Two-way ANOVA with Sidak's multiple comparisons test	21 vs 19	0.3236	0.9113	0.7707
2-S2 C	Hot plate test (7–8 weeks)	Response latency	Mann-Whitney test	30 vs 30	0.0741	Mann-Whitney test	19 vs 20	0.6071	0.0069	0.2569	0.9962	0.3219
	Hot plate test (16–17 weeks)	Response latency	Mann-Whitney test	30 vs 29	0.3928	Mann-Whitney test	20 vs 19	0.2942	<0.0001	0.1166	0.4711	0.6121
3A	Novel object recognition test: 24-hour memory	Preference index (Day 4)	Two-way ANOVA with Sidak's multiple comparisons test	24 vs 24	< 0.0001	Two-way ANOVA with Sidak's multiple comparisons test	21 vs 19	< 0.0001	0.0354	0.6011	0.0012 (Day 4)	0.0015 (Day 4)
3B	Fear conditioning: 24-hour memory (7–8 weeks)	Contextual memory (freeze)	Mann-Whitney test	22 vs 22	< 0.0001	Mann-Whitney test	19 vs 20	< 0.0001	0.3005	0.2662
3C		Cued memory (freeze)	Unpaired t test with Welch's correction		< 0.0001	Mann-Whitney test		< 0.0001	0.131	0.9195
3D	Fear conditioning: 24-hour memory (16–17 weeks)	Contextual memory (freeze)	Mann-Whitney test	30 vs 29	< 0.0001	Mann-Whitney test	20 vs 19	< 0.0001	0.1136	0.4242
3E		Cued memory (freeze)	Mann-Whitney test	30 vs 29	0.0003	Unpaired t test with Welch's correction	20 vs 19	0.0002	0.5263	0.0627
3-S1 A	Novel object recognition test: 5-minute memory	Preference index (Day 4)	Two-way ANOVA with Sidak's multiple comparisons test	12 vs 12	< 0.0001				0.8443
3-S1 B	Novel object recognition: 24-hour memory	Interaction time	Two-way ANOVA with Sidak's multiple comparisons test	24 vs 24	0.0042				0.8936
3-S1 C	Modified novel object recognition: 24-hour memory	Interaction time	Two-way ANOVA with Sidak's multiple comparisons test	12 vs 12	0.6955				0.7767
3-S1 D		Preference index (Day 4)	Two-way ANOVA with Sidak's multiple comparisons test	12 vs 12	0.0206				0.3995
3-S1 E	Fear conditioning: 1-hour memory (19 weeks)	Contextual memory (freeze)	Mann-Whitney test	14 vs 14	0.0009				0.0648
		Cued memory (freeze)	Unpaired t test with Welch's correction	14 vs 14	< 0.0001				0.1905
3-S1 F	Y maze spontaneous alternation test	Number of choice	Mann-Whitney test	16 vs 16	0.3079				0.0411		0.6215	0.9901
		Alternation	Unpaired t test with Welch's correction	16 vs 16	0.8177				0.0436		0.9956	0.9593
4A	Elevated plus maze test	Number of entries to open arms	Mann-Whitney test	22 vs 22	0.0075	Unpaired t test with Welch's correction	24 vs 24	0.0376	0.4601	0.2378
4B		Moving distance in open arms	Mann-Whitney test		0.0723	Unpaired t test with Welch's correction		0.0014	0.9223	0.2199
4C	Light-dark chamber test	Number of transitions between chambers	Unpaired t test with Welch's correction	16 vs 16	0.0278	Mann-Whitney test	24 vs 24	0.0311	0.5878	0.0156			0.137	0.3196
4D		Moving distance in light chamber	Unpaired t test with Welch's correction		0.0003	Mann-Whitney test		0.0034	0.5033	0.1629
4E	Hole-board test	Number of poked holes	Mann-Whitney test	36 vs 36	0.9479	Mann-Whitney test	26 vs 27	0.4395	0.0855	0.0018			0.4748	0.3019
4F		Total number of pokes	Mann-Whitney test		0.1383	Unpaired t test with Welch's correction		0.0017	0.0082	0.028	0.5283	0.7693	0.656	0.0005
4G		Number of repetitive pokes	Two-way ANOVA		0.0457	Two-way ANOVA		0.0002	0.9141	0.1042
4-S1 A	Elevated plus maze test	Total distance	Mann-Whitney test	22 vs 22	0.2651	Unpaired t test with Welch's correction	24 vs 24	0.7515	0.8413	0.1385
4-S1 B		Moving distance in closed arms	Mann-Whitney test	22 vs 22	0.8073	Unpaired t test with Welch's correction	24 vs 24	0.0223	0.3852	0.2951
4-S1 C	Light-dark chamber test	Total distance	Mann-Whitney test	16 vs 16	0.0152	Unpaired t test with Welch's correction	24 vs 24	0.8551	0.6618	0.0415			0.873	0.6812
4-S1 D		Moving distance in dark chamber	Unpaired t test with Welch's correction	16 vs 16	0.9281	Unpaired t test with Welch's correction	24 vs 24	0.0041	0.9572	0.0425			0.1977	0.0146
5A	Resident-intruder test	Attack latency	Mann-Whitney test	13 vs 12	0.0016	Mann-Whitney test	20 vs 19	0.0218
5B		Total duration of attacks	Mann-Whitney test		0.001	Mann-Whitney test		0.0099
5C		Number of attack	Mann-Whitney test		0.0053	Mann-Whitney test		0.015
5D	Tube test	Winning rate	Wilcoxon signed rank test	23	0.0003	Wilcoxon signed rank test	21	0.0072			0.0923	0.001	0.4063	0.0116
5E	Three-chamber test	Interaction time	Two-way ANOVA with Sidak's multiple comparisons test	16 vs 16 (Stxbp1+/+: partner vs object)	0.0013	Two-way ANOVA with Sidak's multiple comparisons test	21 vs 21 (Stxbp1+/+: partner vs object)	< 0.0001	0.2936	0.6653
				15 vs 15 (Stxbp1tm1d/+: partner vs object)	< 0.0001		19 vs 19 (Stxbp1tm1a/+: partner vs object)	< 0.0001
5G	Nesting test	Score of nest	Two-way ANOVA with Sidak's multiple comparisons test	25 vs 23	< 0.0001	Two-way ANOVA with Sidak's multiple comparisons test	28 vs 28	< 0.0001	0.0904	0.6048
5H	Marble bury	Number of buried marbles	Unpaired t test with Welch's correction	25 vs 24	< 0.0001	Mann-Whitney test	28 vs 28	< 0.0001	0.9314	0.2584
5-S1 A	Partition test	Interaction time	Two-way ANOVA with Sidak's multiple comparisons test	16 vs 16 (Stxbp1+/+ vs Stxbp1tm1d/+)	0.0886				0.0003		0.4859	0.0253
				16 vs 16 (Stxbp1+/+: novel vs familiar)	0.0017
				16 vs 16 (Stxbp1+/+: novel vs familiar-repeat)	0.0001
				16 vs 16 (Stxbp1tm1d/+: novel vs familiar)	< 0.0001
				16 vs 16 (Stxbp1tm1d/+: novel vs familiar-repeat)	0.0003
6E	Video-EEG/EMG - SWD	Frequency of SWD	Unpaired t test with Welch's correction	11 vs 13	< 0.0001				0.4526
		SWD duration	Unpaired t test with Welch's correction		0.3958				0.1757
		Spike rate in SWD	Mann-Whitney test		0.2455				0.7319
6F		Number of SWD	Two-Way ANOVA		< 0.0001				0.3252
6I	Video-EEG/EMG - Myoclonic jump	Total myoclonic jumps	Mann-Whitney test	11 vs 13	< 0.0001				0.3637
		Myoclonic jumps in REM	Mann-Whitney test		< 0.0001				0.3878
		Myoclonic jumps in NREM	Mann-Whitney test		< 0.0001				0.6714
		Myoclonic jumps in awake	Mann-Whitney test		0.002				0.6862
6J	Video-EEG/EMG - Myoclonic jerk	Total myoclonic jerks	Mann-Whitney test	11 vs 13	0.001				0.6071
		Myoclonic jerks in REM	Mann-Whitney test		0.0002				0.6609
		Myoclonic jerks in NREM	Mann-Whitney test		0.0795				0.5248
		Myoclonic jerks in awake	Mann-Whitney test		0.0007				0.6888
7C	Cortical neuron densities	NeuN	Unpaired t test with Welch's correction	5 vs 7	0.3783
		Pv	Unpaired t test with Welch's correction	5 vs 7	0.843
		Sst	Unpaired t test with Welch's correction	5 vs 7	0.8382
7D	Ratios of interneurons to all cortical neurons	Pv/NeuN	Unpaired t test with Welch's correction	5 vs 7	0.4814
		Sst/NeuN	Unpaired t test with Welch's correction	5 vs 7	0.3698
8B	uIPSC - Pv interneurons to pyramidal neurons	Connectivity	Chi-square test	33 of 5 vs 32 of 5	0.9529						>0.9999	0.9516
8C		uIPSC amplitude	Mann-Whitney test	27 of 5 vs 26 of 5	0.0259				0.7789
8D		Normalized uIPSC amplitude	Two-way ANOVA with Sidak's multiple comparisons test		0.5106				0.8555
N/A		Inter-soma distances	Unpaired t test with Welch's correction	33 of 5 vs 31 of 5	0.6889				0.4268
8F	uIPSC - Sst interneurons to pyramidal neurons	Connectivity	Chi-square test	36 of 5 vs 36 of 5	0.0058						0.0101	0.171
8G		uIPSC amplitude	Mann-Whitney test	34 of 5 vs 25 of 5	0.9454				0.2654
8H		Normalized uIPSC amplitude	Two-way ANOVA with Sidak's multiple comparisons test		0.2869				0.8523
N/A		Inter-soma distances	Unpaired t test with Welch's correction	36 of 5 vs 36 of 5	0.6502				0.8859
8-S1 B	Intrinsic excitability of pyramidal neurons	Resting potential	Unpaired t test with Welch's correction	36 of 6 vs 35 of 6	0.1066				0.9848
8-S1 C		Input resistance	Mann-Whitney test		0.0268				0.4622
8-S1 D		Rheobase current	Mann-Whitney test		0.0503				0.461
8-S2 C	Spontaneous excitatory inputs onto Pv interneurons	Frequency	Unpaired t test with Welch's correction	44 of 6 vs 44 of 6	0.4967				0.0119		0.2222	0.9429
		Amplitude	Mann-Whitney test	44 of 6 vs 44 of 6	0.9173				0.0217		0.9682	0.9639
8-S2 D	Spontaneous excitatory inputs onto Sst interneurons	Frequency	Mann-Whitney test	38 of 5 vs 36 of 5	0.3966				0.0216		0.2583	0.8817
		Amplitude	Mann-Whitney test	38 of 5 vs 36 of 5	0.1757				0.9248
9E	Pv interneurons-mediated quantal IPSCs	Amplitude	Mann-Whitney test	35 of 6 vs 38 of 7	0.0781				<0.0001		0.3598	0.1158
		Charge	Mann-Whitney test	35 of 6 vs 38 of 7	0.1213				<0.0001		0.3141	0.1997
		Decay time constant	Unpaired t test with Welch's correction	35 of 6 vs 38 of 7	0.466				0.0087		0.2372	0.9994
9F	Sst interneurons-mediated quantal IPSCs	Amplitude	Unpaired t test with Welch's correction	27 of 4 vs 26 of 4	0.7683				0.2515
		Charge	Unpaired t test with Welch's correction	27 of 4 vs 26 of 4	0.7285				0.0913
		Decay time constant	Unpaired t test with Welch's correction	27 of 4 vs 26 of 4	0.294				0.2927
